# Supplementary material
Source: publisher figshare collection journal article supplement (https://gsajournals.figshare.com/articles/dataset/_/11367821)
Supplement: Supplementary file 1 [file 1]

Archive with 8 entries (8 files):
- 2019 - Lens IF CrossPriming - Supplementary Table 1.xlsx
- 2019 - Lens IF CrossPriming - Supplementary Table 2.xlsx
- 2019 - Lens IF CrossPriming - Supplementary Table 3.xlsx
- 2019 - Lens IF CrossPriming - Supplementary Table 4.xlsx
- Deecker_FigS1.pdf
- Deecker_FigS2.pdf
- Deecker_FigS3.pdf
- Deecker_FigS4.pdf
