# Supplementary material
Source: publisher figshare collection journal article supplement (https://gsajournals.figshare.com/articles/dataset/_/11367821)
Supplement: Supplementary file 1 [file 1 › 2019 - Lens IF CrossPriming - Supplementary Table 1.xlsx]

## Sheet: Table S1
TABLE S1
The isolates used in the bioinformatic analysis of type I-F CRISPR-Cas systems.
Name	Accession Number	Database	Program that identified the CRISPR system	Considered redundant based on phylogenetic analyses	Additional Notes
Legionella pneumophila str. Alcoy	NC_014125.1	Genbank	CRISPRCasFinder, CRISPRDetect	--
Legionella pneumophila str. C8_S	CP015939.1 (chromosome), CP015940.1 (plasmid)	Genbank	CRISPRCasFinder, CRISPRDetect	--
Legionella pneumophila str. FFI104	CP016872.1	Genbank	CRISPRCasFinder, CRISPRDetect	--
Legionella pneumophila str. FFI105	CP016873.1	Genbank	CRISPRCasFinder, CRISPRDetect	Yes (FFI104)
Legionella pneumophila str. FFI337	CP016876.1	Genbank	CRISPRCasFinder, CRISPRDetect	Yes (FFI104)
Legionella pneumophila str. Lens	NC_006369.1 (chromosome), NC_006366.1 (plasmid)	Genbank	CRISPRCasFinder, CRISPRDetect	--
Legionella pneumophila str. Calgary2017	GCA_003345635.1	GenBank	CRISPRCasFinder, CRISPRDetect	--
Legionella pneumophila str. Mississauga2006	SRX1091506	Sequence Read Archive	CRISPRCasFinder, CRISPRDetect	--
Legionella pneumophila str. 2531STDY5467307	FJAB01	European Nucleotide Archive	CRISPRCasFinder, CRISPRDetect	--
Legionella pneumophila str. 2531STDY5467313	FJAD01	European Nucleotide Archive	CRISPRCasFinder, CRISPRDetect	--
Legionella pneumophila str. 2531STDY5467293	FJAJ01	European Nucleotide Archive	CRISPRCasFinder, CRISPRDetect	--
Legionella pneumophila str. 2531STDY5467317	FJAM01	European Nucleotide Archive	CRISPRCasFinder, CRISPRDetect	--
Legionella pneumophila str. 2531STDY5467292	FJBI01	European Nucleotide Archive	CRISPRCasFinder, CRISPRDetect	Yes (FJAJ01)
Legionella pneumophila str. 2531STDY5467289	FJBU01	European Nucleotide Archive	CRISPRCasFinder, CRISPRDetect	Yes (FJAJ01)
Legionella pneumophila str. 2531STDY5467322	FJBW01	European Nucleotide Archive	CRISPRCasFinder, CRISPRDetect	--
Legionella pneumophila str. 2531STDY5467368	FJDB01	European Nucleotide Archive	CRISPRCasFinder, CRISPRDetect	--	Removed from downstream analyses due to potential assembly errors with CRISPR array
Legionella pneumophila str. 2531STDY5467401	FJDP01	European Nucleotide Archive	CRISPRCasFinder, CRISPRDetect	--
Legionella pneumophila str. 2531STDY5467437	FJEH01	European Nucleotide Archive	CRISPRCasFinder, CRISPRDetect	--	Removed from downstream analyses due to potential assembly errors with CRISPR array
Legionella pneumophila str. 2531STDY5467440	FJEI01	European Nucleotide Archive	CRISPRCasFinder, CRISPRDetect	--	Removed from downstream analyses due to potential assembly errors with CRISPR array
Legionella pneumophila str. 2531STDY5467453	FJEJ01	European Nucleotide Archive	CRISPRCasFinder, CRISPRDetect	--
Legionella pneumophila str. 2531STDY5467426	FJEK01	European Nucleotide Archive	CRISPRCasFinder, CRISPRDetect	Yes (FJEJ01)
Legionella pneumophila str. 2531STDY5467455	FJEL01	European Nucleotide Archive	CRISPRCasFinder, CRISPRDetect	Yes (FJEJ01)
Legionella pneumophila str. 2531STDY5467459	FJEM01	European Nucleotide Archive	CRISPRCasFinder, CRISPRDetect	Yes (FJEJ01)
Legionella pneumophila str. 2531STDY5467458	FJEN01	European Nucleotide Archive	CRISPRCasFinder, CRISPRDetect	Yes (FJEJ01)
Legionella pneumophila str. 2531STDY5467461	FJEO01	European Nucleotide Archive	CRISPRCasFinder, CRISPRDetect	Yes (FJEJ01)
Legionella pneumophila str. 2531STDY5467462	FJEP01	European Nucleotide Archive	CRISPRCasFinder, CRISPRDetect	Yes (FJEJ01)
Legionella pneumophila str. 2531STDY5467460	FJEQ01	European Nucleotide Archive	CRISPRCasFinder, CRISPRDetect	Yes (FJEJ01)
Legionella pneumophila str. 2531STDY5467463	FJER01	European Nucleotide Archive	CRISPRCasFinder, CRISPRDetect	Yes (FJEJ01)
Legionella pneumophila str. 2531STDY5467467	FJES01	European Nucleotide Archive	CRISPRCasFinder, CRISPRDetect	Yes (FJEJ01)
Legionella pneumophila str. 2531STDY5467468	FJET01	European Nucleotide Archive	CRISPRCasFinder, CRISPRDetect	Yes (FJEJ01)
Legionella pneumophila str. 2531STDY5467466	FJEU01	European Nucleotide Archive	CRISPRCasFinder, CRISPRDetect	Yes (FJEJ01)
Legionella pneumophila str. 2531STDY5467469	FJEV01	European Nucleotide Archive	CRISPRCasFinder, CRISPRDetect	Yes (FJEJ01)
Legionella pneumophila str. 2531STDY5467471	FJEW01	European Nucleotide Archive	CRISPRCasFinder, CRISPRDetect	Yes (FJEJ01)
Legionella pneumophila str. 2531STDY5467456	FJEX01	European Nucleotide Archive	CRISPRCasFinder, CRISPRDetect	Yes (FJEJ01)
Legionella pneumophila str. 2531STDY5467457	FJEY01	European Nucleotide Archive	CRISPRCasFinder, CRISPRDetect	Yes (FJEJ01)
Legionella pneumophila str. 2531STDY5467464	FJEZ01	European Nucleotide Archive	CRISPRCasFinder, CRISPRDetect	Yes (FJEJ01)
Legionella pneumophila str. 2531STDY5467465	FJFA01	European Nucleotide Archive	CRISPRCasFinder, CRISPRDetect	Yes (FJEJ01)
Legionella pneumophila str. 2532STDY5467639	FJMD01	European Nucleotide Archive	CRISPRCasFinder, CRISPRDetect	--
Legionella pneumophila str. ATCC 43283	JFID01	European Nucleotide Archive	CRISPRCasFinder, CRISPRDetect	--
Legionella pneumophila str. ATCC 33156	JFIM01	European Nucleotide Archive	CRISPRCasFinder, CRISPRDetect	--
Legionella pneumophila str. ATCC 43283	LAXR01	European Nucleotide Archive	CRISPRCasFinder, CRISPRDetect	Yes (JFID01)
Legionella pneumophila str. SH135	LAYB01	European Nucleotide Archive	CRISPRCasFinder, CRISPRDetect	--	Removed from downstream analyses due to potential assembly errors with CRISPR array
Legionella pneumophila str. WX2011046	LBAK01	European Nucleotide Archive	CRISPRCasFinder, CRISPRDetect	--
Legionella pneumophila str. WD_4_1102b-36	LBAN01	European Nucleotide Archive	CRISPRCasFinder, CRISPRDetect	--
Legionella pneumophila str. ATCC 33156	LBAV01	European Nucleotide Archive	CRISPRCasFinder, CRISPRDetect	--
Legionella pneumophila str. NCTC12000	UGOL01	European Nucleotide Archive	CRISPRCasFinder, CRISPRDetect	--
Legionella pneumophila str. NCTC12024	UGOM01	European Nucleotide Archive	CRISPRCasFinder, CRISPRDetect	--
