# Supplementary material
Source: publisher figshare collection journal article supplement (https://gsajournals.figshare.com/articles/dataset/_/11367821)
Supplement: Supplementary file 1 [file 1 › 2019 - Lens IF CrossPriming - Supplementary Table 2.xlsx]

## Sheet: Table S2
TABLE S2
The bacterial strains and plasmids used in this study.
Name	Description
Legionella pneumophila str. Lens	The wild type strain of L. pneumophila str. Lens
SD-L1	Legionella pneumophila str. Lens transformed with the SD-E3 plasmid
SD-L3	Legionella pneumophila str. Lens transformed with the SD-E1 plasmid
SD-L5	Legionella pneumophila str. Lens transformed with the SD-E5 plasmid
SD-L6	Legionella pneumophila str. Lens transformed with the SD-E6 plasmid
SD-L8	Legionella pneumophila str. Lens transformed with the SD-E12 plasmid
SD-L12	Legionella pneumophila str. Lens transformed with the SD-E22 plasmid
SD-L56	Legionella pneumophila str. Lens with the chromosomal CRISPR-Cas array deleted, save for the last repeat. Independent clone 1.
SD-L57	Legionella pneumophila str. Lens with the chromosomal CRISPR-Cas array deleted, save for the last repeat. Independent clone 2.
SD-L58	SD-L56 transformed with the SD-E5 plasmid
SD-L59	SD-L57 transformed with the SD-E5 plasmid
SD-E1	Priming plasmid with the protospacer sequence for the chromosomal Lens spacer 1 on the DNA (-) strand, pMMB207 vector backbone with chloramphenicol resistance
SD-E3	Priming plasmid with the protospacer sequence for the plasmid Lens spacer 1 on the DNA (-) strand, pMMB207 vector backbone with chloramphenicol resistance
SD-E5	Priming plasmid with the protospacer sequence for the plasmid Lens spacer 50 on the DNA (-) strand, pMMB207 vector backbone with chloramphenicol resistance
SD-E6	Priming plasmid with the protospacer sequence for the chromosomal Lens spacer 23 on the DNA (-) strand, pMMB207 vector backbone with chloramphenicol resistance
SD-E12	Priming plasmid with the protospacer sequence for the plasmid Lens spacer 50 on the DNA (+) strand, pMMB207 vector backbone with chloramphenicol resistance
SD-E22	Priming plasmid with a scrambled protospacer sequence on the DNA (-) strand, pMMB207 vector backbone with chloramphenicol resistance
SD-E46	pJB4648 vector backbone with an insert designed to knock out the chromosomal Lens CRISPR array, save for the last repeat, through allelic replacement. Gentamycin resistant with a sacB marker for sucrose selection.
