# Supplementary material
Source: publisher figshare collection journal article supplement (https://gsajournals.figshare.com/articles/dataset/_/11367821)
Supplement: Supplementary file 1 [file 1 › 2019 - Lens IF CrossPriming - Supplementary Table 3.xlsx]

## Sheet: Table S3
TABLE S3
The oligos used in this study.
Name	Sequence (5'-3')	Description
Lens-IF-pool-F	AGTTTGGTCAAATGCTTCAATACTT	Used to screen L. pneumophila Lens samples for spacer acquisition, primer on leader sequence and has 100% identity for both chromosomal and plasmid Lens systems so can be used to screen for both systems.
pLens-IF-R	AGGATCATTAGAAAATCTTTTACGC	Used to screen L. pneumophila Lens samples for spacer acquisition on the plasmid Lens I-F system, primer on 3rd spacer in CRISPR array.
cLens-IF-R	ATTCACATTTAACTCCAAATTTTGTT	Used to screen L. pneumophila Lens samples for on the chromosomal Lens I-F system, primer on 3rd spacer in CRISPR array.
pLens-IF-sp1(-)_F	CCCTTTTAAAAACCAATTTTTGCCGTGGCTCGATGGGCTGCA	The insert for the plasmid Lens spacer 1 targeted sequence on the DNA (-) strand. Contains PAMs on both side of the insert and ApaI/PstI overhangs when annealed with the complementary oligo.
pLens-IF-sp1(-)_R	GCCCATCGAGCCACGGCAAAAATTGGTTTTTAAAAGGGGGCC	Complementary oligo to pLens-IF-sp1(-)_F.
pLens-IF-sp50(-)_F	CCCAATACGTGGTTATGACCTCATCTAAAGACGTAGGCTGCA	The insert for the plasmid Lens spacer 50 targeted sequence on the DNA (-) strand. Contains PAMs on both side of the insert and ApaI/PstI overhangs when annealed with the complementary oligo.
pLens-IF-sp50(-)_R	GCCTACGTCTTTAGATGAGGTCATAACCACGTATTGGGGGCC	Complementary oligo to pLens-IF-sp50(-)_F.
pLens-IF-sp50(+)_F	CCCTACGTCTTTAGATGAGGTCATAACCACGTATTGGCTGCA	The insert for the plasmid Lens spacer 50 targeted sequence on the DNA (+) strand. Contains PAMs on both side of the insert and ApaI/PstI overhangs when annealed with the complementary oligo.
pLens-IF-sp50(+)_R	GCCAATACGTGGTTATGACCTCATCTAAAGACGTAGGGGGCC	Complementary oligo to pLens-IF-sp50(+)_F.
cLens-IF-sp1(-)_F	CCCTTTTAAAAAACTTTAAGTTCTTTTCTGAAACAGGCTGCA	The insert for the chromosomal Lens spacer 1 targeted sequence on the DNA (-) strand. Contains PAMs on both side of the insert and ApaI/PstI overhangs when annealed with the complementary oligo.
cLens-IF-sp1(-)_R	GCCTGTTTCAGAAAAGAACTTAAAGTTTTTTAAAA GGGGGCC	Complementary oligo to cLens-IF-sp1(-)_F.
cLens-IF-sp23(-)_F	CCCTGATTGGTTTCTTTTTCTTGACTGTTCTTTGAGGCTGCA	The insert for the chromosomal Lens spacer 23 targeted sequence on the DNA (-) strand. Contains PAMs on both side of the insert and ApaI/PstI overhangs when annealed with the complementary oligo.
cLens-IF-sp23(-)_R	GCCTCAAAGAACAGTCAAGAAAAAGAAACCAATCAGGGGGCC	Complementary oligo to cLens-IF-sp23(-)_F.
