# Supplementary material
Source: publisher figshare collection journal article supplement (https://gsajournals.figshare.com/articles/dataset/_/11367821)
Supplement: Supplementary file 1 [file 1 › 2019 - Lens IF CrossPriming - Supplementary Table 4.xlsx]

## Sheet: Table S4
TABLE S4
The number of acquired spacers for the chromosomal Lens CRISPR-Cas system following array replenishment via cross-priming.
Deletion Mutant	Total number of acquired spacers	% of new spacers that map to priming plasmid
Clone 1	738	98.92
Clone 2	2726	98.86
