# Supplementary material
Source: publisher figshare collection journal article supplement (https://gsajournals.figshare.com/articles/dataset/_/11367821)
Supplement: Supplementary file 1 [file 1 › Deecker_FigS4.pdf]

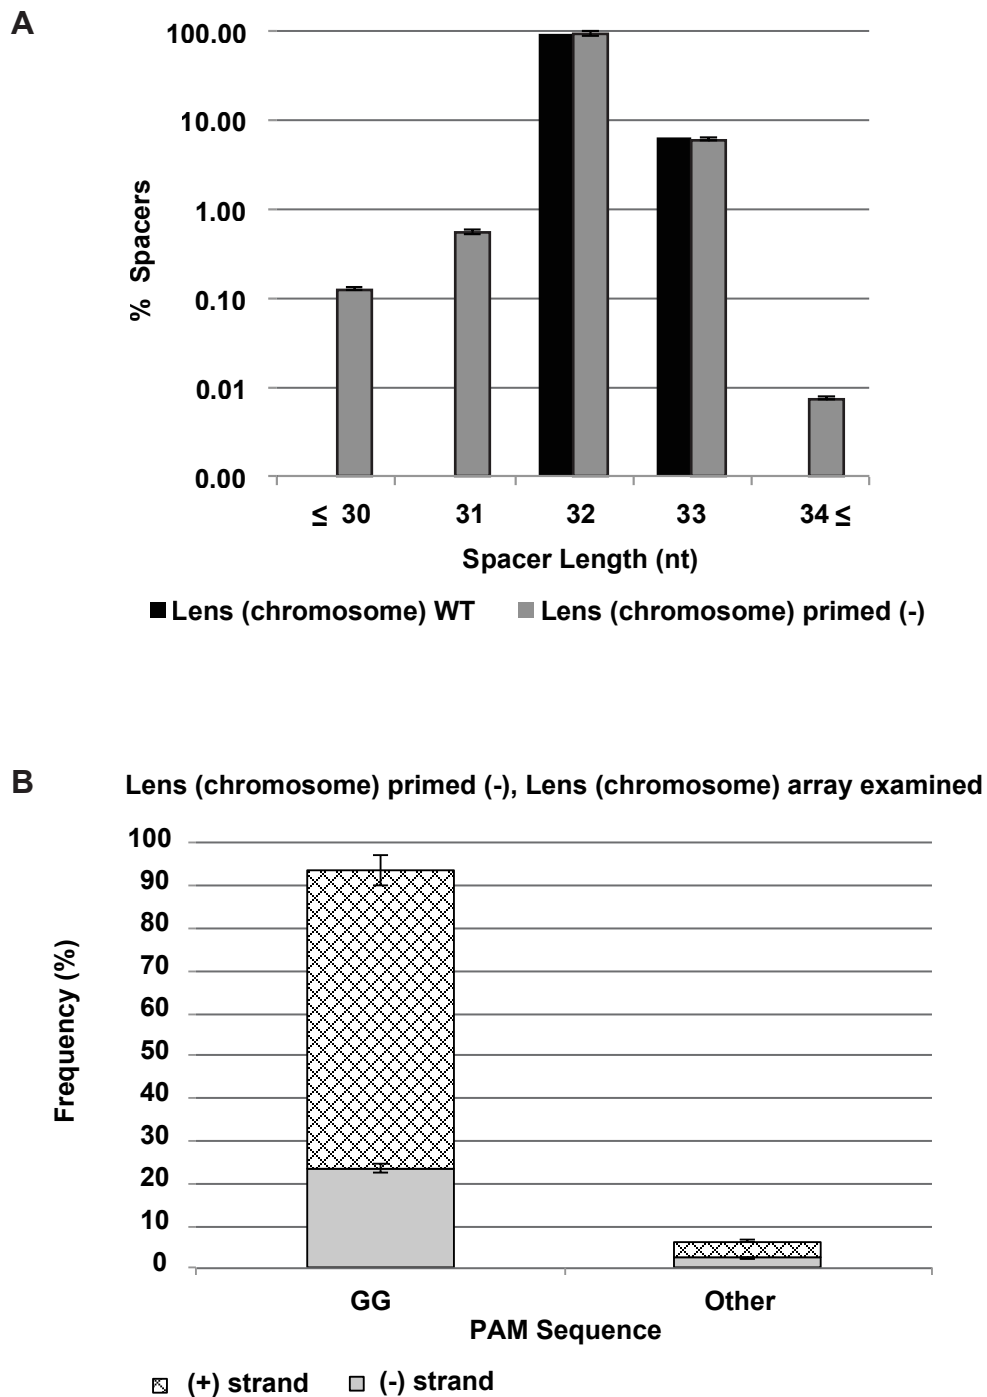

**Figure S4 | Spacer length and PAM distributions for the Lens (chromosome) CRISPR-Cas system.** Experimental set-up is as described for supplemental figure 1. All data is the average of three biological replicates. **A)** The distribution of spacer length acquired from the targeted plasmid compared to the wild-type CRISPR-Cas array (n = 64 spacers in the wild-type array). **B)** Quantification of the PAMs for the new protospacers in a stacked bar plot.
