# Supplementary material
Source: publisher figshare collection journal article supplement (https://gsajournals.figshare.com/articles/dataset/_/11367821)
Supplement: Supplementary file 6 [file 2]

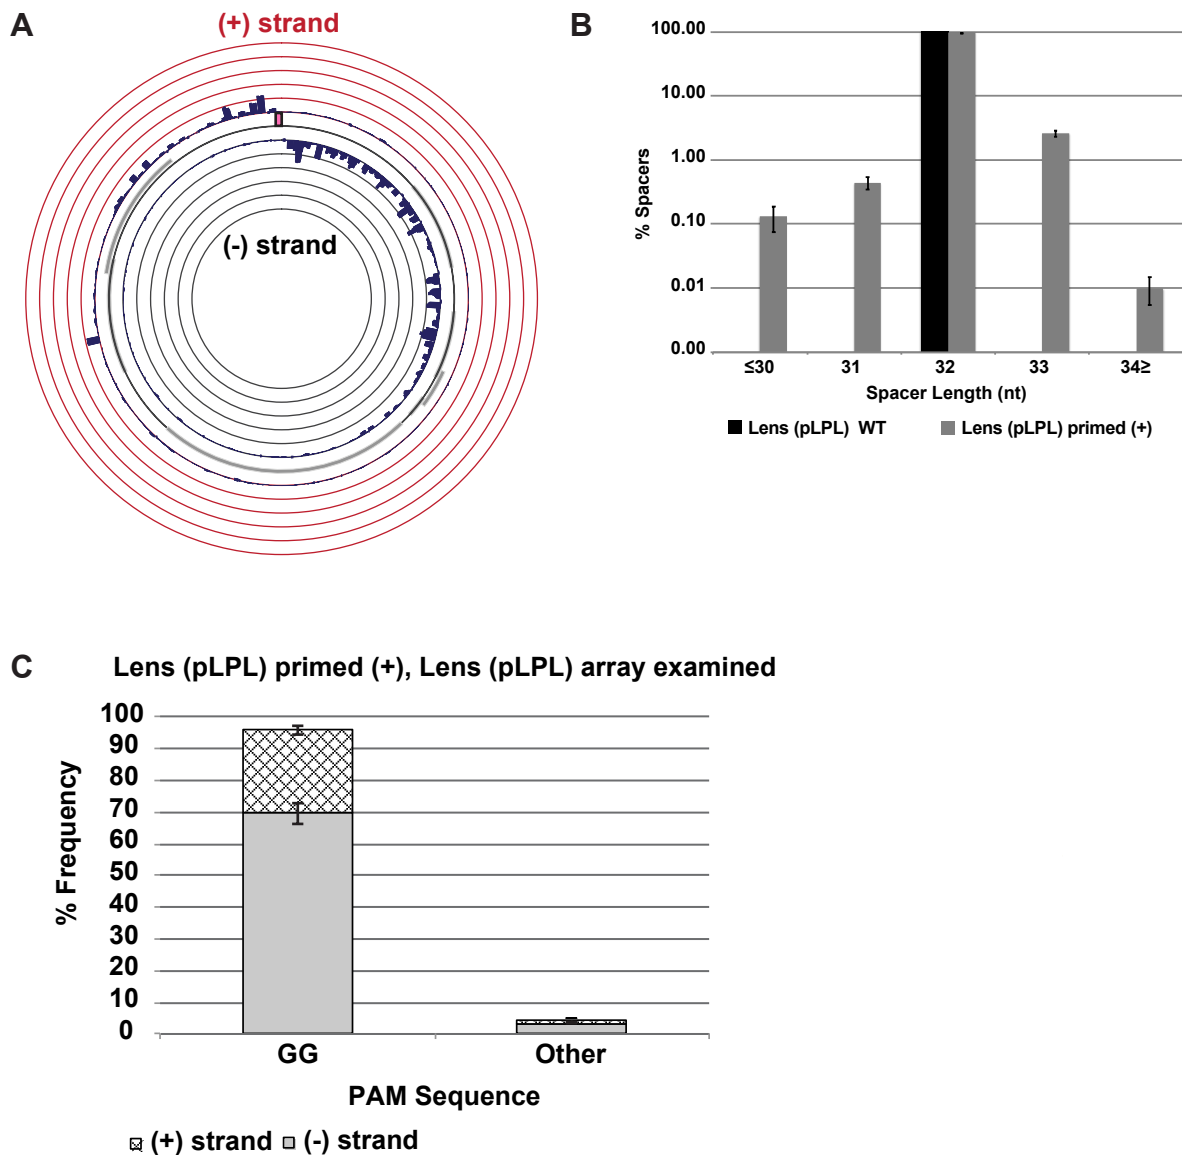

**Figure S2 | The targeted spacer acquisition distribution for the Lens (pLPL) system when the priming protospacer is on the (+) strand.** The experimental set-up is the same as described for supplemental figure 1. All data is the average of three biological replicates. **A)** Reversing the direction of the targeted sequence on the priming plasmid creates a mirrored distribution bias in acquired protospacers. **B)** The distribution of spacer lengths acquired from the targeted plasmid compared to the wild-type CRISPR-Cas array (n = 53 spacers in the wild-type array). **C)** Quantification of the PAMs for the new protospacers in a stacked bar plot.
